# Supplementary material
Source: ML conference proceedings conference paper supplement (https://openreview.net/forum?id=HjfvnxaU5k)
Supplement: supplementary_material [file attachment]

## Experimental Details

We have conducted all our experiments in a server with the following specifications.

- **RAM:** 16 GB
- **Processor:** Intel (R) Xeon(R) W-2133 CPU @ 3.60GHz
- **GPU:** NVIDIA Quadro P 1000 4GB + 8GB Memory
- **Operating System:** Ubuntu 18.04 LTS Bionic

We recommend installing the following dependencies for the smooth execution of the modules.

- **Python** - 3.6
- **scipy** - 1.2.1
- **numpy** - 1.16.2
- **pandas** - 0.24.2
- **scikit-learn** - 0.21.2

For running the experiments, please follow the steps mentioned below.

1. Navigate to directory named “**Code**”, containing the source files required for conducting the experiments.
2. For Synthetic experiments:
  - (a) Navigate to “**Synthetic**” folder  
\$ **cd Synthetic**
  - (b) Modify experimental parameters in **ExpParams.py**
  - (c) Specify the experimental parameters  
\$ **python RunModeller.py -f <function\_name>**  
For example: \$ **python RunModeller.py -f Griewank5D**
