# Supplementary material
Source: ML conference proceedings conference paper supplement (https://openreview.net/forum?id=HjfvnxaU5k)

# Update Observation Pool

**Observations  
Pool**

**Surrogate  
Model**

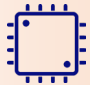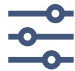

**BOAP  
Suggestion**

**Evaluate**

**Expert  
Preferences**

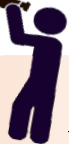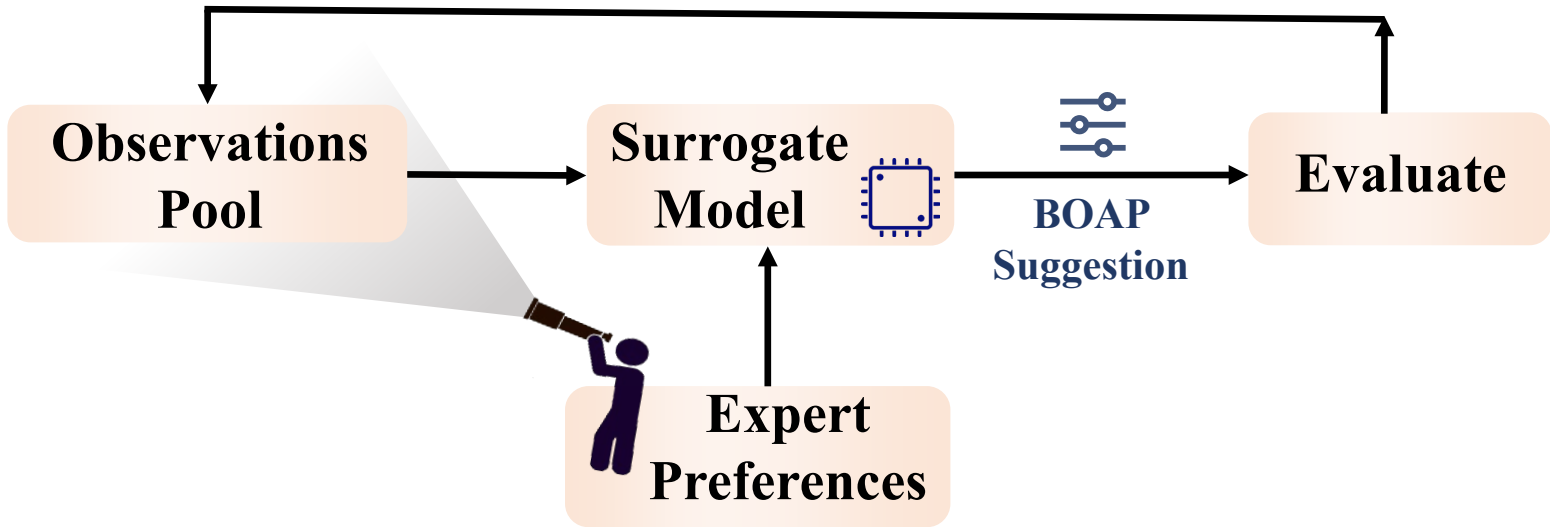

Supplement: supplementary_material [file attachment]
