# Supplementary material
Source: ML conference proceedings conference paper supplement (https://openreview.net/forum?id=HjfvnxaU5k)

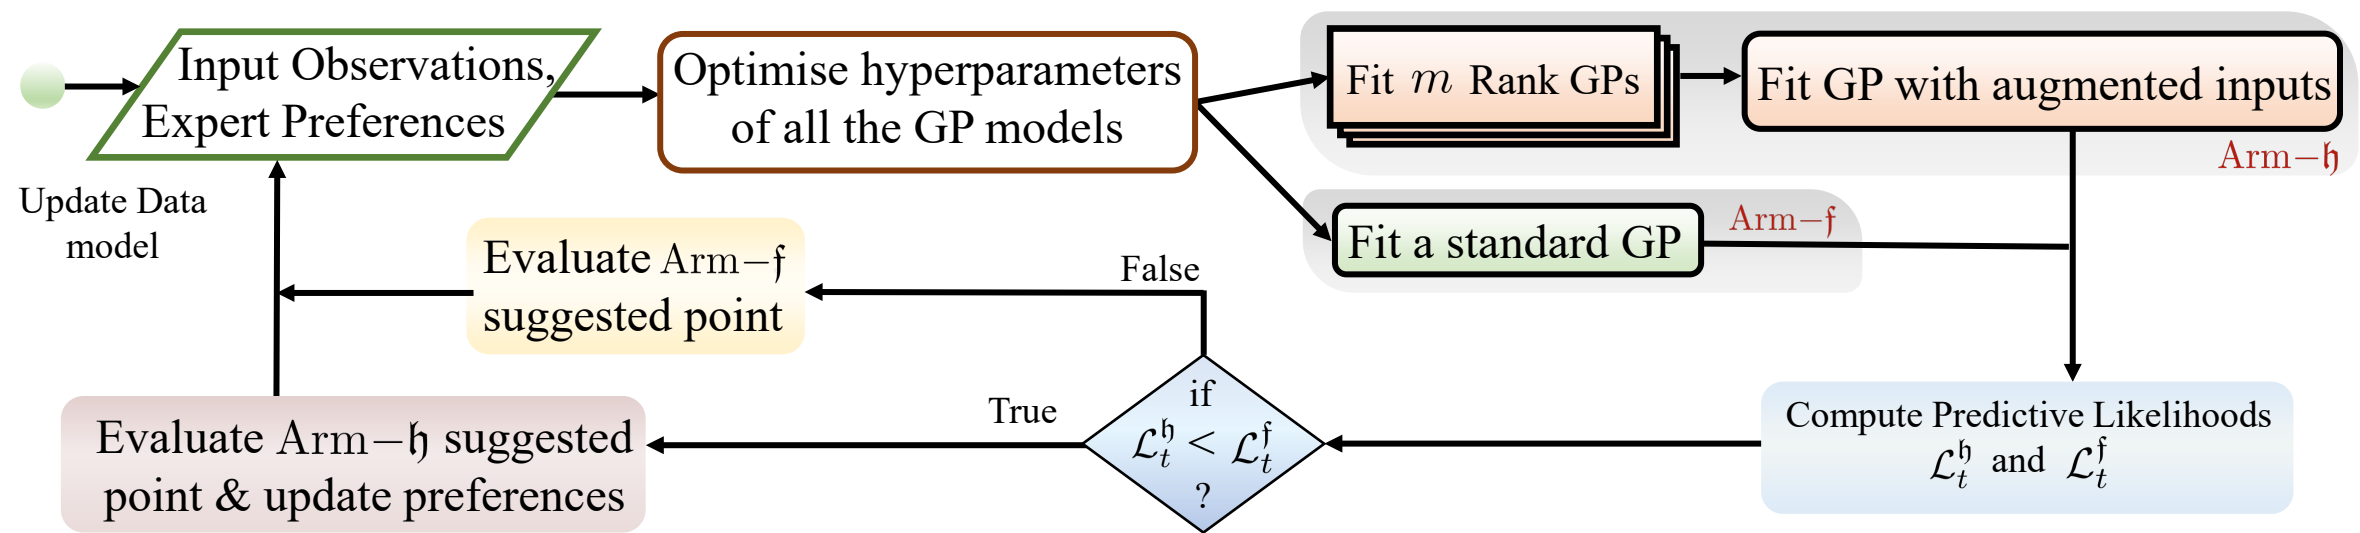

Supplement: supplementary_material [file attachment]

(b) Battery Endurance Maximization

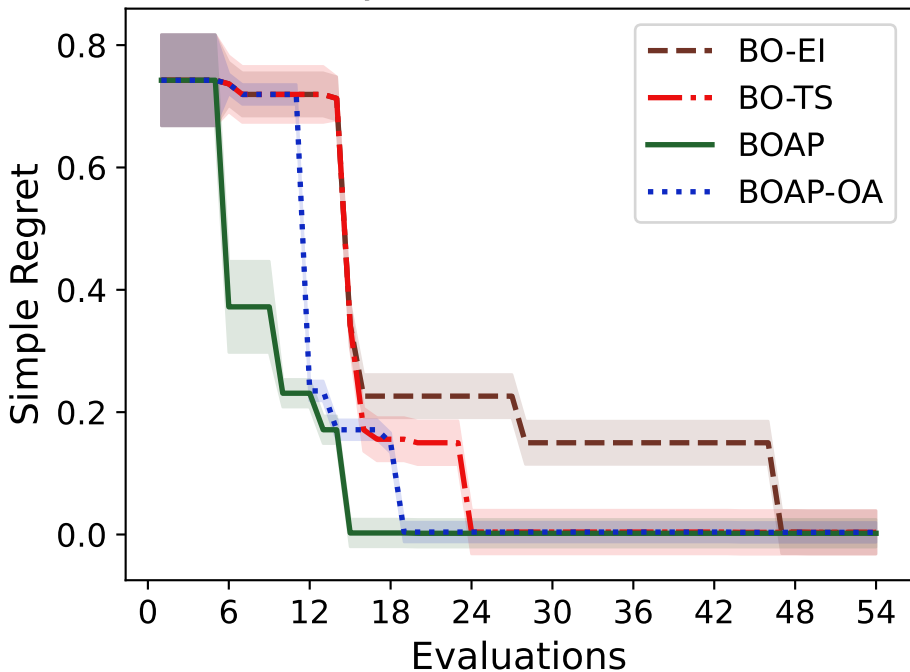

Supplement: supplementary_material [file attachment]

# Rosenbrock 3D Function

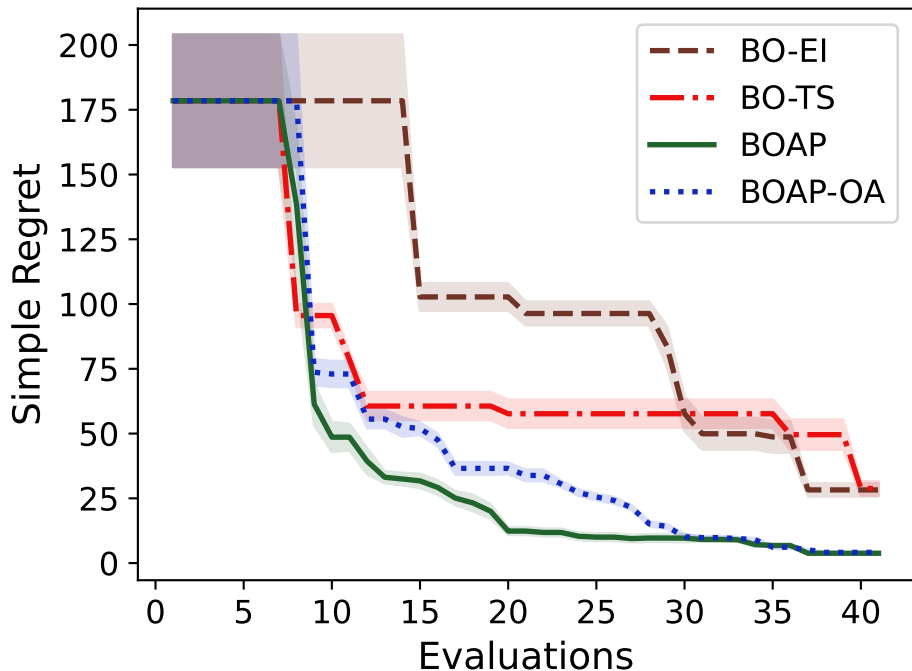

Supplement: supplementary_material [file attachment]

# Benchmark1D Function

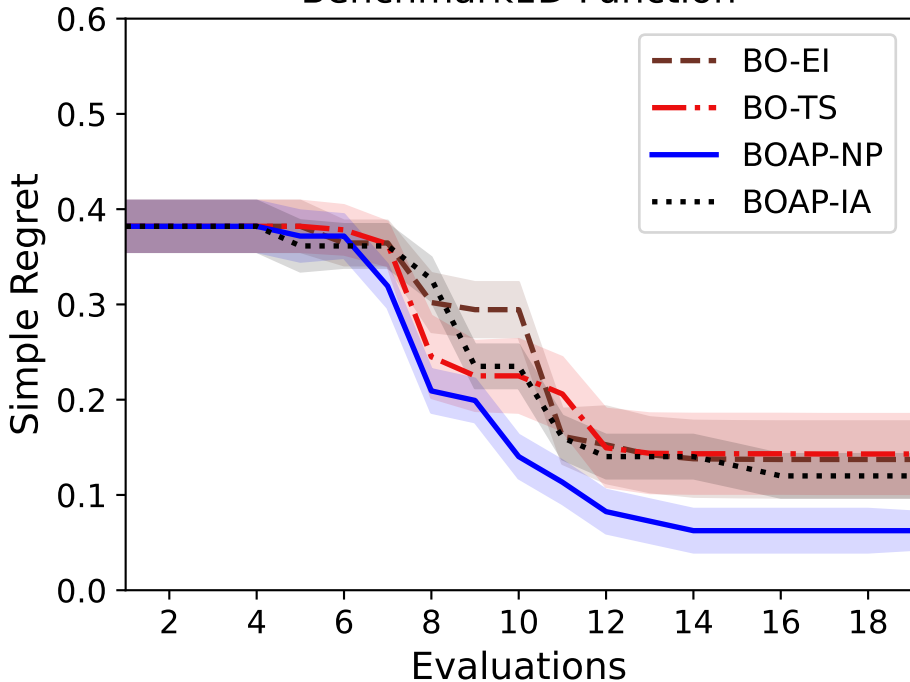

Supplement: supplementary_material [file attachment]

# Rosenbrock 3D Function

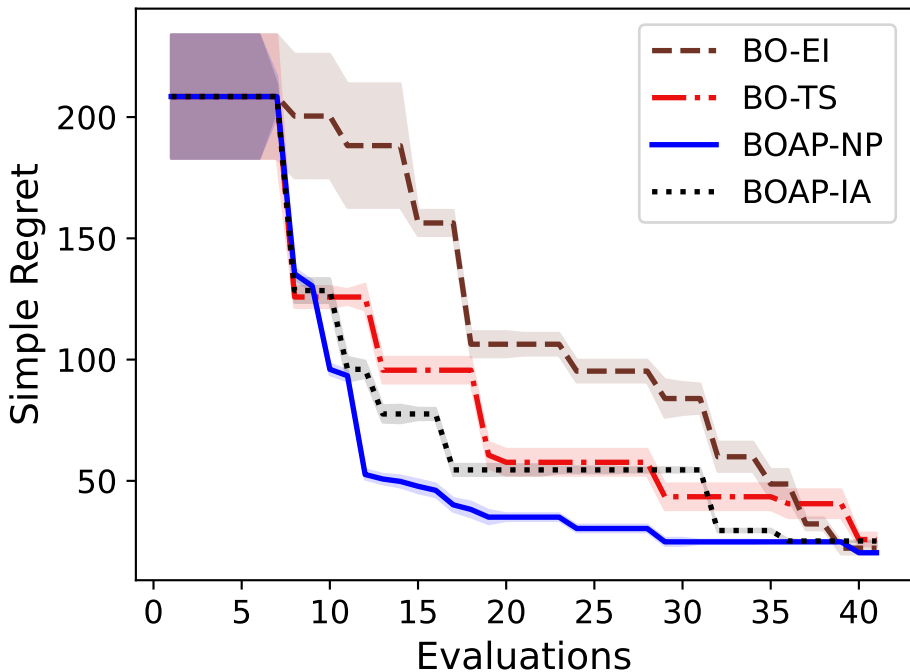

Supplement: supplementary_material [file attachment]

# Histogram

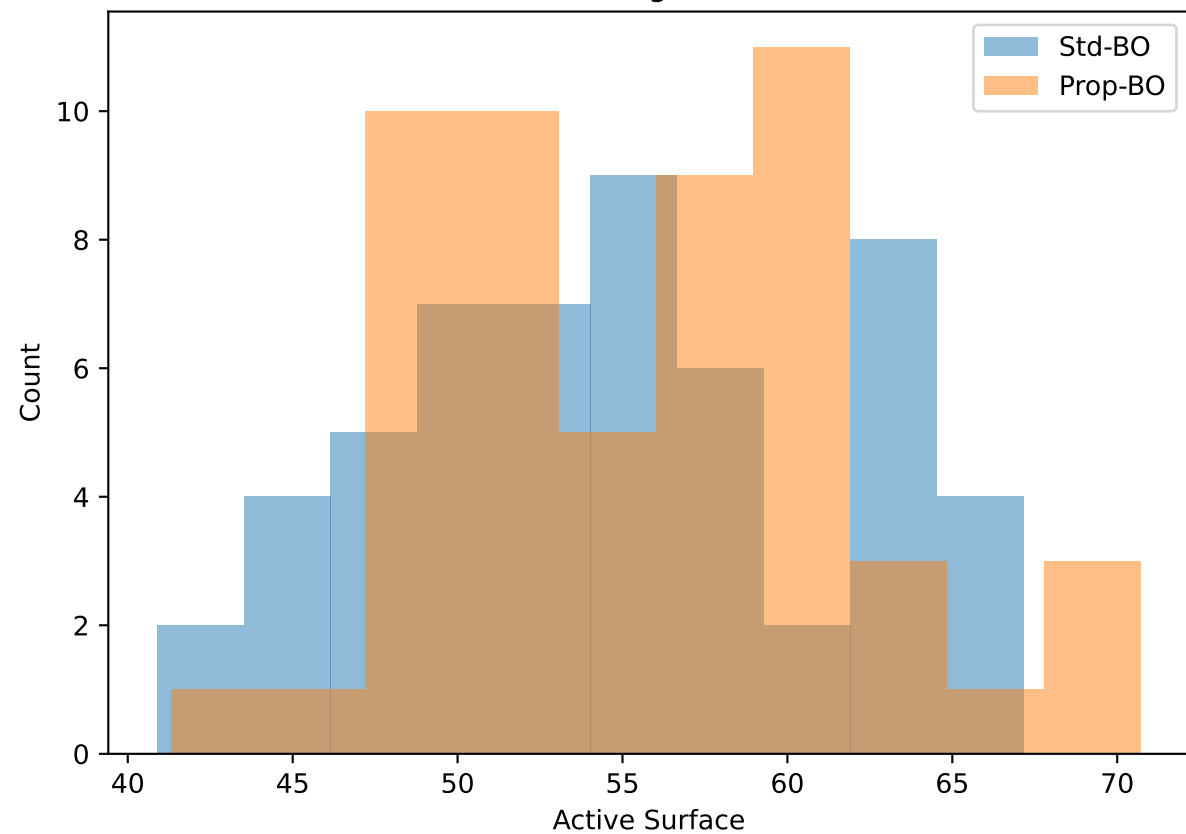

Supplement: supplementary_material [file attachment]

# Benchmark1D Function

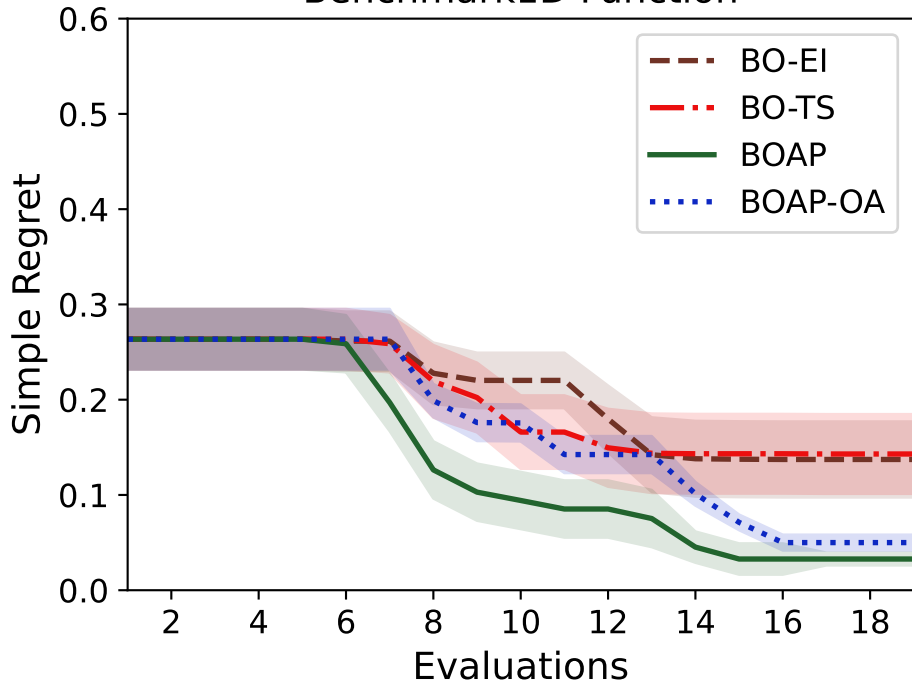

Supplement: supplementary_material [file attachment]

(a) Battery Optimization

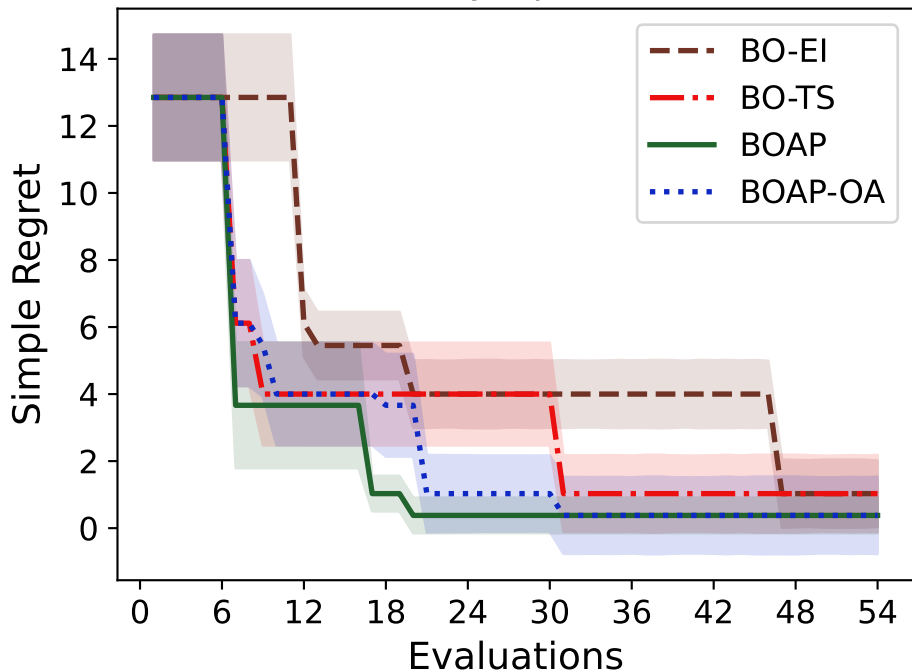

Supplement: supplementary_material [file attachment]

# Griewank 5D Function

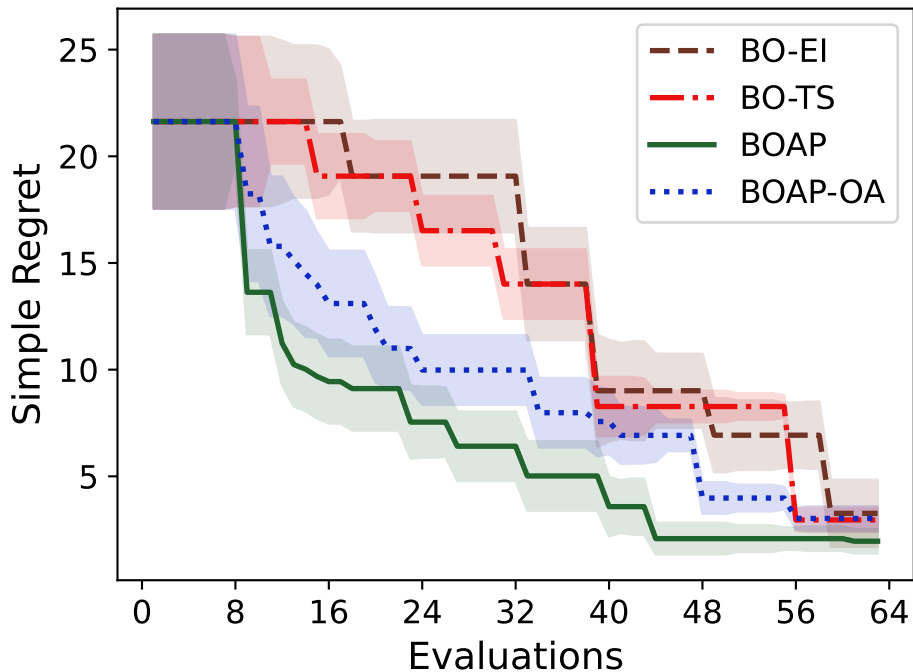

Supplement: supplementary_material [file attachment]

# Griewank 5D Function

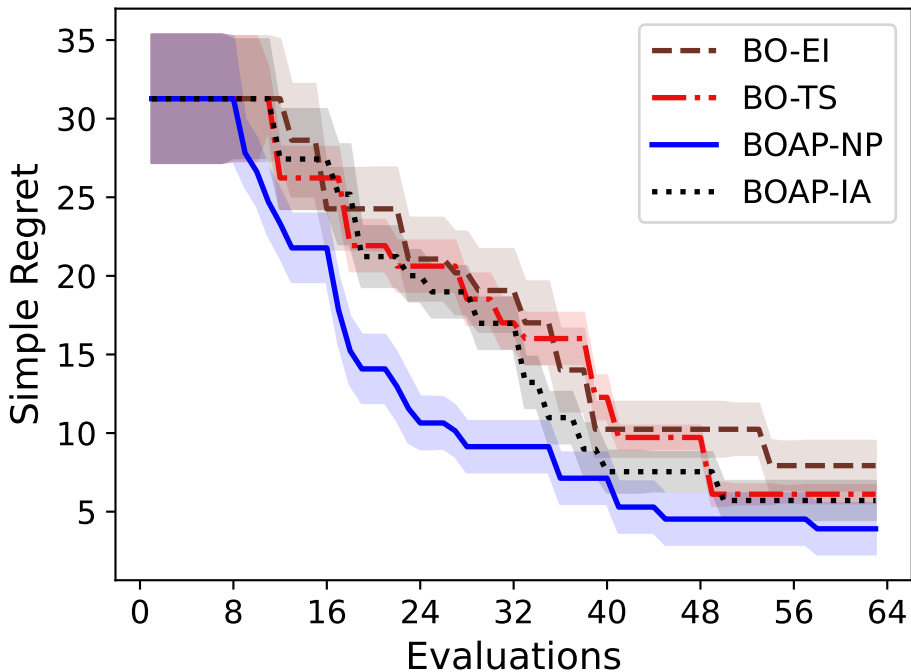

Supplement: supplementary_material [file attachment]

Arm-f

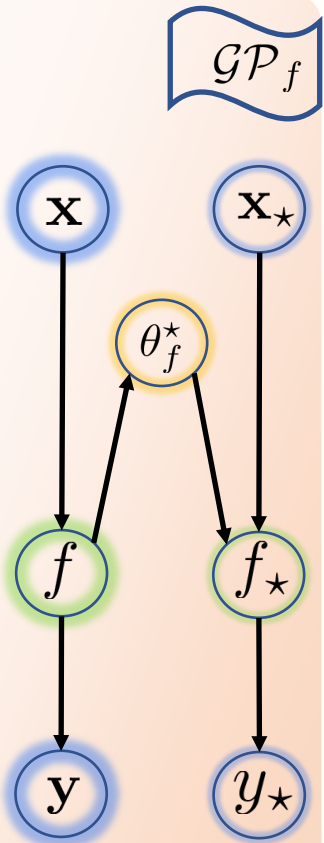

Arm-h

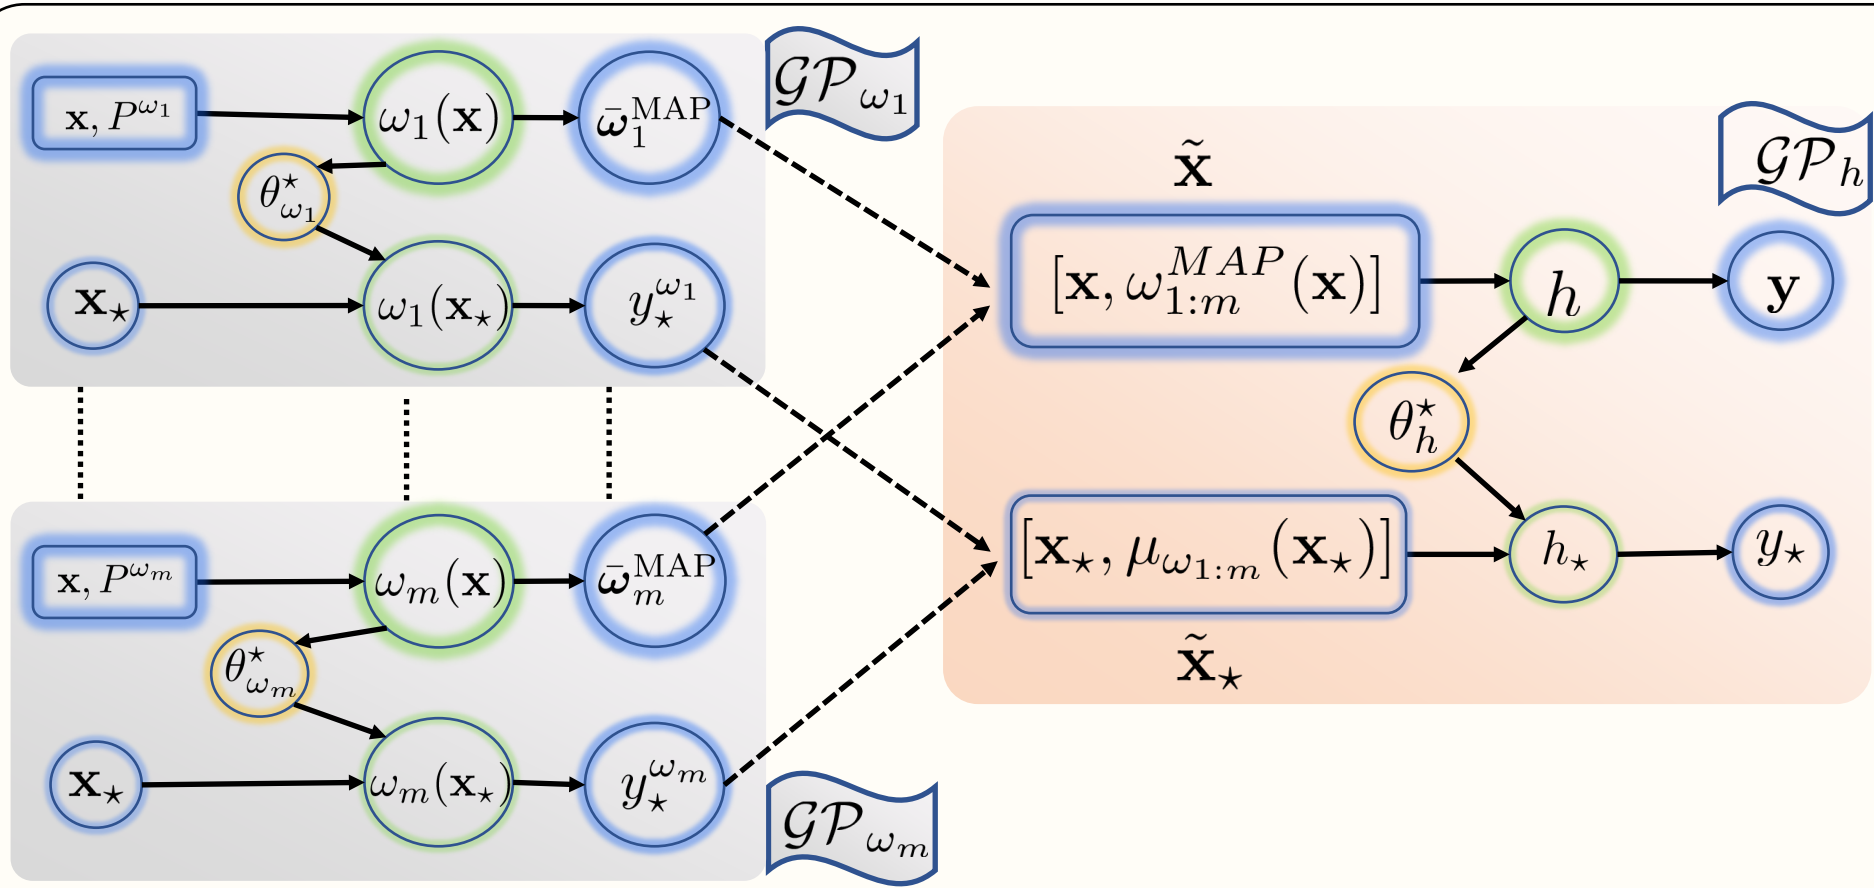

Supplement: supplementary_material [file attachment]
